# Supplementary material for: Inferring locomotor behaviours in Miocene New World monkeys using finite element analysis, geometric morphometrics and machine-learning classification techniques applied to talar morphology
Source: J R Soc Interface. 2018 Sep 26;15(146):20180520. doi: 10.1098/rsif.2018.0520 (PMC6170775; doi:10.1098/rsif.2018.0520)
Supplement: Finite element model information and stress results [file rsif20180520supp3.xlsx]

## Sheet: SM3
Table S3. FEA model information and obtained von Mises stress results. Key: AM: arithmetic mean; MWAM: mesh-weighted arithmetic mean; M: median; MWM: mesh-weighted median ; M(25%): 25% percentile; M(50%): 50% percentile; M(75%):75% percentile; M(95%): 95% percentile; PEofAM: percentage error of the arithmetic mean; PEofM: percentage error of the median.
Specimen	Average Body Mass (g)	Body Weight Force [N]	Volume of the model [mm3]	Numbers of elements	AM	MWAM	PeofAM	M	MWM	PEofM	M(25%)	M(50%)	M(75%)	M(95%)
Extant specimens
Alouatta caraya	5375	15.8186	1702.8	345230	0.252542	0.249024	1.41274	0.1274	0.126453	0.74858	0.069783	0.1274	0.24798	0.73004
Alouatta seniculus	5950	17.5108	1186.53	382757	0.471522	0.467896	0.775044	0.26408	0.261455	1.00417	0.14772	0.26408	0.473882	1.29787
Aotus azarae	1205	3.54631	303.077	331074	0.187418	0.18657	0.454461	0.10415	0.101919	2.18916	0.057934	0.10415	0.17697	0.540752
Aotus infulatus	1215	3.57574	161.553	416393	0.269961	0.267107	1.06853	0.15396	0.151502	1.62251	0.0820985	0.15396	0.26713	0.771647
Aotus nancymaae	787	2.31614	225.207	336589	0.0984879	0.0981474	0.346936	0.043196	0.04313	0.15311	0.022799	0.043196	0.10028	0.34593
Aotus trivirgatus	786	2.3132	205.172	321450	0.324324	0.321257	0.954936	0.1826	0.180897	0.941198	0.1021	0.1826	0.31512	1.0366
Ateles belzebuth	8070	23.75	2532.46	344673	0.276028	0.273145	1.05575	0.14819	0.146362	1.24925	0.084323	0.14819	0.2543	0.849647
Ateles fusciceps	9025	26.5606	2594.97	352527	0.316707	0.315165	0.489131	0.17866	0.177059	0.904395	0.10623	0.17866	0.29525	0.91385
Ateles geoffroyi	7535	22.1755	2561.37	348531	0.358746	0.355564	0.894791	0.21718	0.215125	0.955158	0.12658	0.21718	0.34487	0.867128
Ateles marginatus	10230	30.1069	2362.84	321892	0.344608	0.341685	0.855445	0.1801	0.17943	0.373663	0.10321	0.1801	0.336195	1.0111
Cacajao calvus	3165	9.31459	868.944	281534	0.228347	0.225165	1.41341	0.10804	0.107414	0.583067	0.060137	0.10804	0.21016	0.682126
Callicebus cupreus	1070	3.14901	251.266	206752	0.220688	0.218067	1.2019	0.13158	0.128953	2.03686	0.06919	0.13158	0.22463	0.587628
Callicebus donacophilus	950	2.79585	248.242	328852	0.0990195	0.0991599	0.141622	0.0478355	0.0473501	1.02516	0.024463	0.0478355	0.0993025	0.352278
Callicebus moloch	988	2.90768	302.229	382235	0.125515	0.125113	0.322023	0.067328	0.0670057	0.480977	0.037831	0.067328	0.12663	0.372287
Callicebus personatus	1325	3.89947	352.626	288735	0.140459	0.139771	0.491954	0.071697	0.0715771	0.167468	0.043428	0.071697	0.12747	0.47076
Callicebus torquatus	1325	3.89947	299.061	299368	0.147575	0.145769	1.23936	0.083825	0.0826371	1.43744	0.050594	0.083825	0.13664	0.437564
Callimico goeldii	483.5	1.42294	85.3015	269334	0.109618	0.109223	0.36146	0.051863	0.0512895	1.11821	0.026372	0.051863	0.1158	0.378102
Mico argentatus	345	1.01534	53.24	269334	0.109618	0.109223	0.36146	0.051863	0.0512895	1.11821	0.026372	0.051863	0.1158	0.378102
Callithrix geoffroyi	359	1.05654	59.2531	299573	0.141413	0.14052	0.635676	0.077783	0.0764648	1.72396	0.047867	0.077783	0.1243	0.449074
Callithrix jacchus	320.5	0.943232	57.9621	293129	0.163152	0.161194	1.21456	0.086286	0.0848308	1.71541	0.051296	0.086286	0.145193	0.49541
Callithrix penicillata	325.5	0.957947	51.5712	259924	0.130031	0.129352	0.525006	0.0666995	0.0655817	1.70451	0.0329805	0.0666995	0.14996	0.383773
Mico humeralifer	473.5	1.39351	62.5429	370120	0.146509	0.145937	0.39177	0.0781595	0.0773284	1.07478	0.0439345	0.0781595	0.14367	0.417895
Cebuella pygmaea	116	0.341388	14.6103	371370	0.131482	0.130822	0.504662	0.0742495	0.0736942	0.753527	0.043276	0.0742495	0.13165	0.40311
Cebus albifrons	2735	8.04911	622.741	347017	0.180414	0.179722	0.385261	0.074187	0.0746244	0.586161	0.042052	0.074187	0.17298	0.647397
Cebus apella	3085	9.07916	790.963	440087	0.219093	0.217354	0.799951	0.12062	0.118284	1.97455	0.064093	0.12062	0.22035	0.628893
cebus nigritus	2825	8.31398	822.115	457220	0.230274	0.227208	1.34961	0.12489	0.123235	1.34325	0.0684575	0.12489	0.221655	0.665265
cebus olivaceus	2905	8.54942	921.471	512797	0.176974	0.176179	0.451088	0.088271	0.087759	0.583412	0.0484088	0.088271	0.1778	0.537316
Chiropotes satanas	2740	8.06382	810.203	451582	0.244596	0.242022	1.06374	0.11692	0.115281	1.42134	0.061885	0.11692	0.23821	0.712058
Lagothrix lagotricha	7150	21.0425	2096.07	286851	0.342622	0.337314	1.57354	0.20217	0.196653	2.80537	0.113613	0.20217	0.31903	0.963399
Leontopithecus rosalia	609	1.79229	113.296	293964	0.17639	0.174731	0.949722	0.09025	0.0887649	1.67313	0.053725	0.09025	0.15034	0.53653
Mico melanurus	350	1.03005	54.6894	475595	0.127231	0.126689	0.427448	0.054372	0.0542638	0.199325	0.02717	0.054372	0.121228	0.44477
Pithecia monachus	2360	6.94548	509.076	202919	0.210373	0.205979	2.13288	0.099206	0.098188	1.0368	0.0608692	0.099206	0.17275	0.725256
Pithecia pithecia	1760	5.17968	233.137	597809	0.261216	0.260866	0.134082	0.12807	0.128008	0.048045	0.07988	0.12807	0.2339	0.889561
Saguinus fuscicollis	350.5	1.03152	40.5914	204460	0.177606	0.177235	0.209092	0.0931255	0.0928591	0.286908	0.05637	0.0931255	0.17676	0.55758
Saguinus leucopus	492	1.44796	70.174	277957	0.207623	0.205548	1.00943	0.11631	0.114057	1.97556	0.066492	0.11631	0.19638	0.623256
Saguinus midas	545	1.60393	82.196	213317	0.113504	0.111912	1.42261	0.046547	0.0454331	2.45176	0.015967	0.046547	0.10908	0.44181
Saguinus mystax	524.5	1.5436	56.6258	285421	0.258832	0.257068	0.686212	0.15575	0.152588	2.07215	0.093301	0.15575	0.24757	0.729825
Saguinus oedipus	411	1.20957	99.0575	256323	0.121695	0.120245	1.20595	0.066393	0.0657289	1.0104	0.038124	0.066393	0.11469	0.36422
Saimiri boliviensis	811	2.38677	168.67	434947	0.243333	0.239734	1.50136	0.1458	0.142888	2.03814	0.0803735	0.1458	0.23941	0.678814
Saimiri sciureus	720.5	2.12043	162.75	419785	0.156587	0.156315	0.173871	0.083794	0.0832384	0.667488	0.0498598	0.083794	0.14691	0.483362
Fossil specimens
Aotus dindensis	873.501	2.57071	131.945	340928	0.21897	0.217963	0.462005	0.11116	0.110631	0.478251	0.0669645	0.11116	0.22022	0.650753
Carlocebus carmenensis	2913.52	8.57449	684.4	740230	0.247129	0.243971	1.29462	0.12628	0.126738	0.361517	0.078839	0.12628	0.23135	0.73195
Cebupithecia sarmientoi	1825.11	5.3713	366.87	398090	0.267669	0.266679	0.371131	0.15003	0.147558	1.67502	0.086667	0.15003	0.24112	0.74979
Dolichocebus gaimanensis	1600.59	4.71053	377.148	409623	0.175782	0.175033	0.427755	0.093484	0.0932139	0.289765	0.055794	0.093484	0.16693	0.529604
Madre de Dios	352.179	1.03646	57.2419	463393	0.180572	0.179298	0.710812	0.1045	0.103265	1.19563	0.057962	0.1045	0.17703	0.512827
Neosaimiri fieldsi	781.466	2.29986	131.945	145794	0.158188	0.156679	0.962968	0.0811495	0.0803009	1.05679	0.043798	0.0811495	0.16507	0.499598
Paralouatta marianae	4708.85	13.8581	1242.39	400195	0.295577	0.293768	0.615786	0.16324	0.162383	0.527872	0.0928413	0.16324	0.28878	0.832708
Proteropithecia neuquenensis	2006.4	5.90483	482.895	524490	0.235293	0.23359	0.729119	0.1398	0.137135	1.94364	0.081248	0.1398	0.2236	0.65234
Río Cisnes	1509.87	4.44353	407.052	441230	0.237668	0.235782	0.800245	0.146985	0.144028	2.05303	0.081282	0.146985	0.24788	0.58738
Soriacebus ameghinorum	1720.95	5.06475	415.479	451422	0.196137	0.195213	0.47381	0.104	0.103174	0.800485	0.059027	0.104	0.19314	0.589554
